# Supplementary material for: The Efficacy of Non-Pharmacological Interventions on Brain-Derived Neurotrophic Factor in Schizophrenia: A Systematic Review and Meta-Analysis
Source: MDPI journal article supplement (doi:10.3390/ijms17101766), 2016-10-24
Supplement: s1 [file s1]

# Supplementary Materials: The Efficacy of Non-Pharmacological Interventions on Brain-Derived Neurotrophic Factor in Schizophrenia: A Systematic Review and Meta-Analysis

Kenji Sanada, Iñaki Zorrilla, Yusuke Iwata, Cristina Bermúdez-Ampudia, Ariel Graff-Guerrero, Mónica Martínez-Cengotitabengoa and Ana González-Pinto

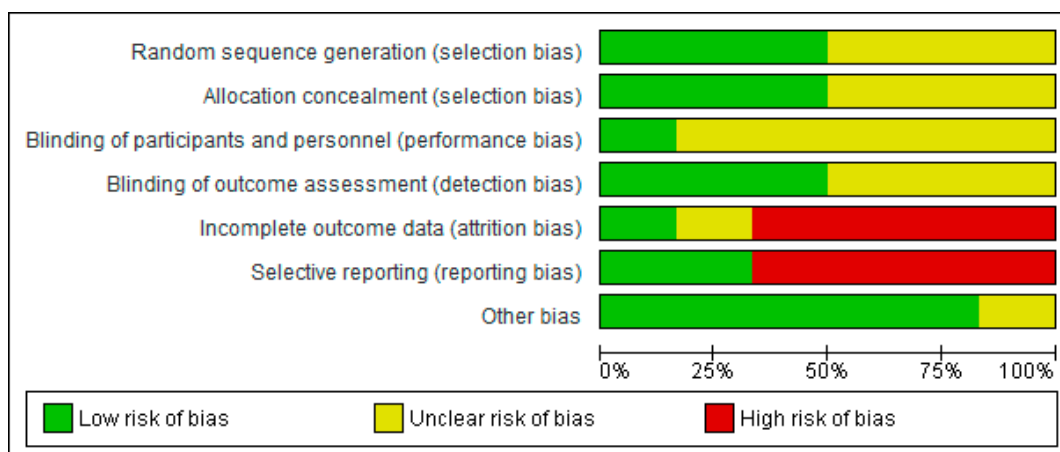

**Figure S1.** Risk-of-bias graph: reviews the authors' judgments about each risk-of-bias item presented as percentages across all of the included studies.

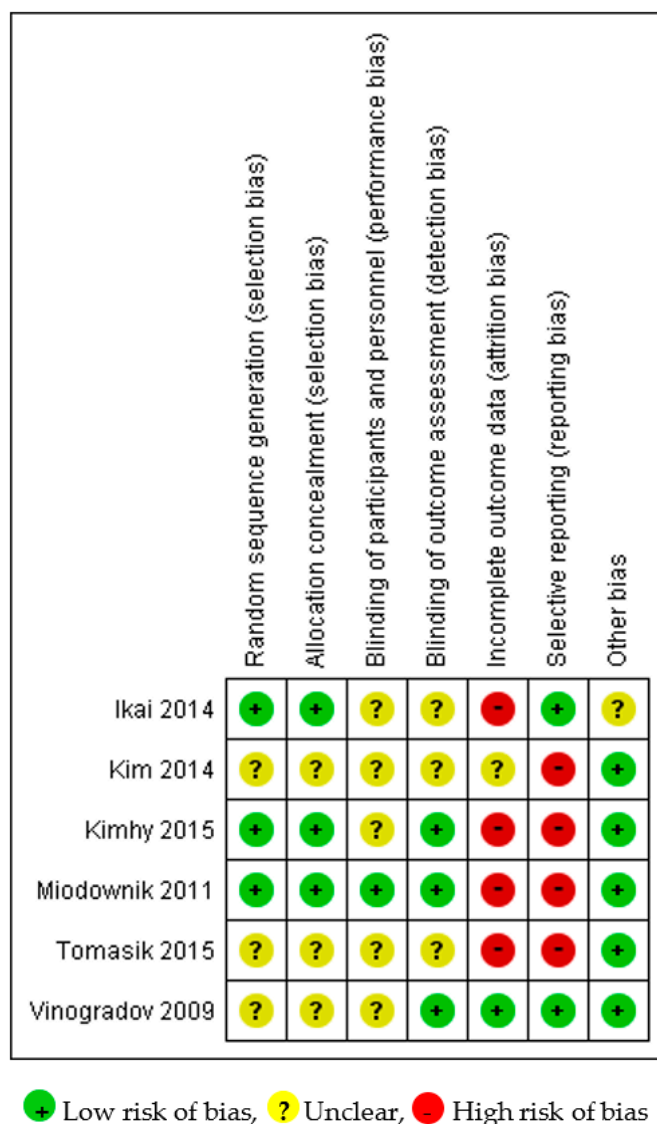

**Figure S2.** Risk-of-bias summary: review of the authors’ judgments about each risk-of-bias item for each included study.

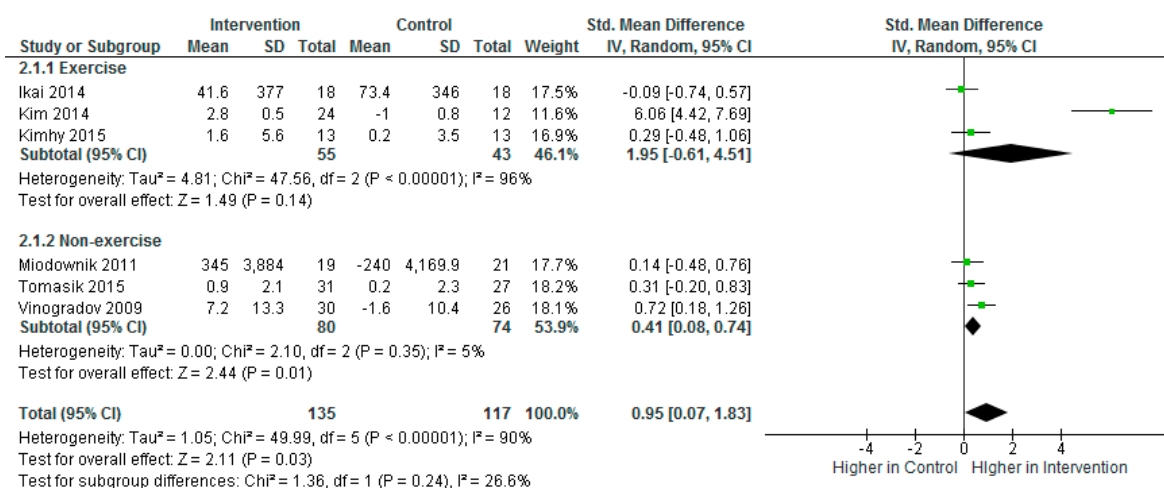

**Figure S3.** Subgroup analysis by type of interventions (exercise or non-exercise). Abbreviations: CI, confidence interval; IV, inverse variance; SD, standard deviation; Std, standard.

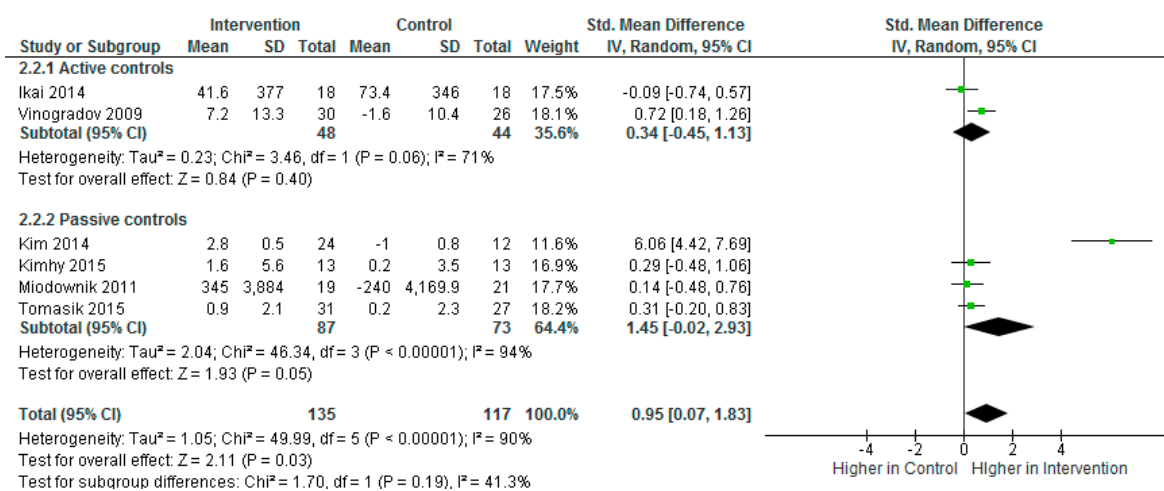

**Figure S4.** Subgroup analysis by control groups (AC or PC). Abbreviations: AC, active control; CI, confidence interval; IV, inverse variance; PC, passive control; SD, standard deviation; Std, standard.

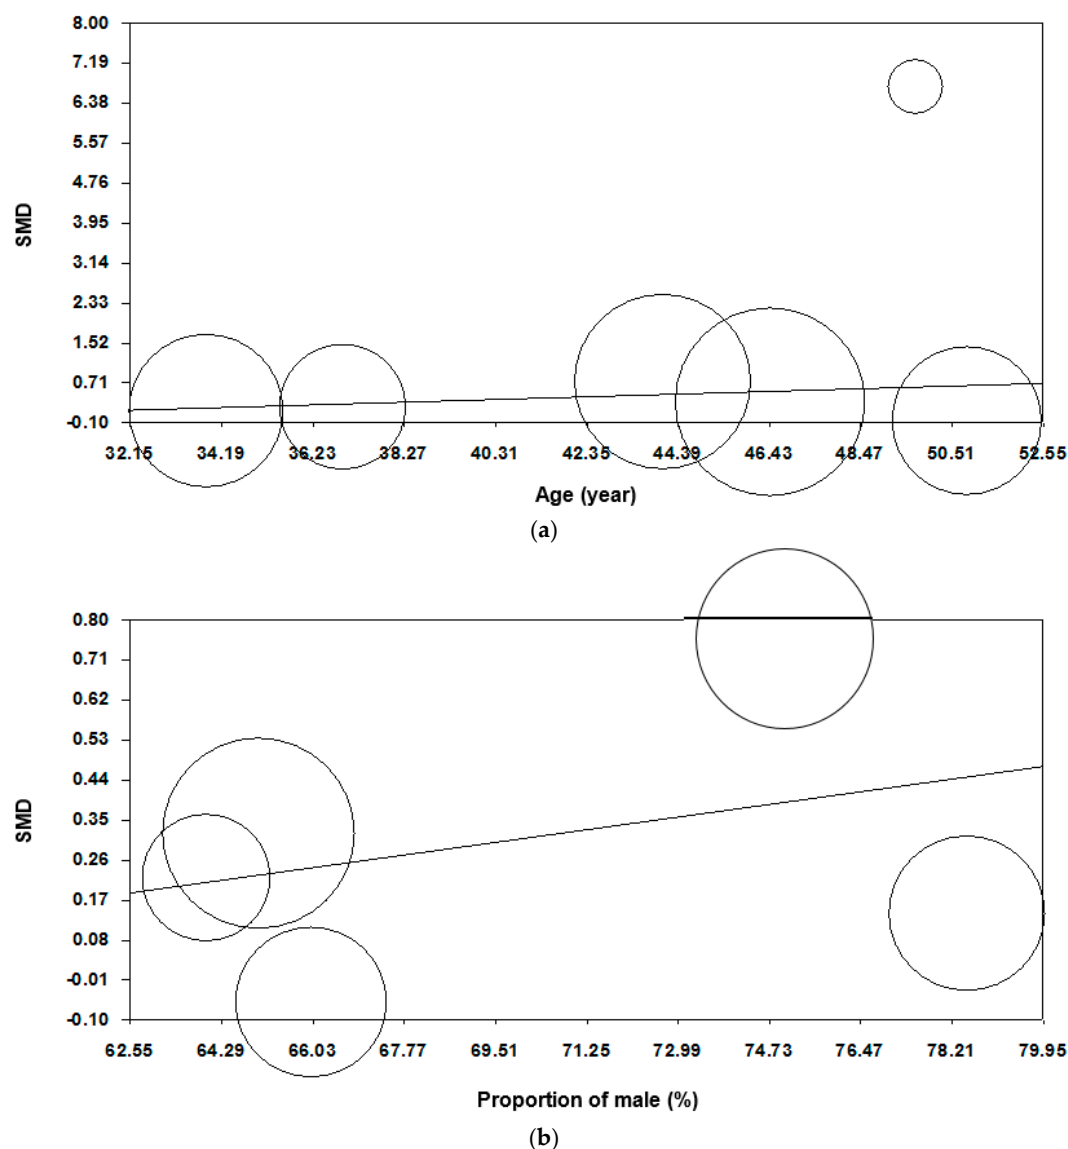

**Figure S5.** Cont.

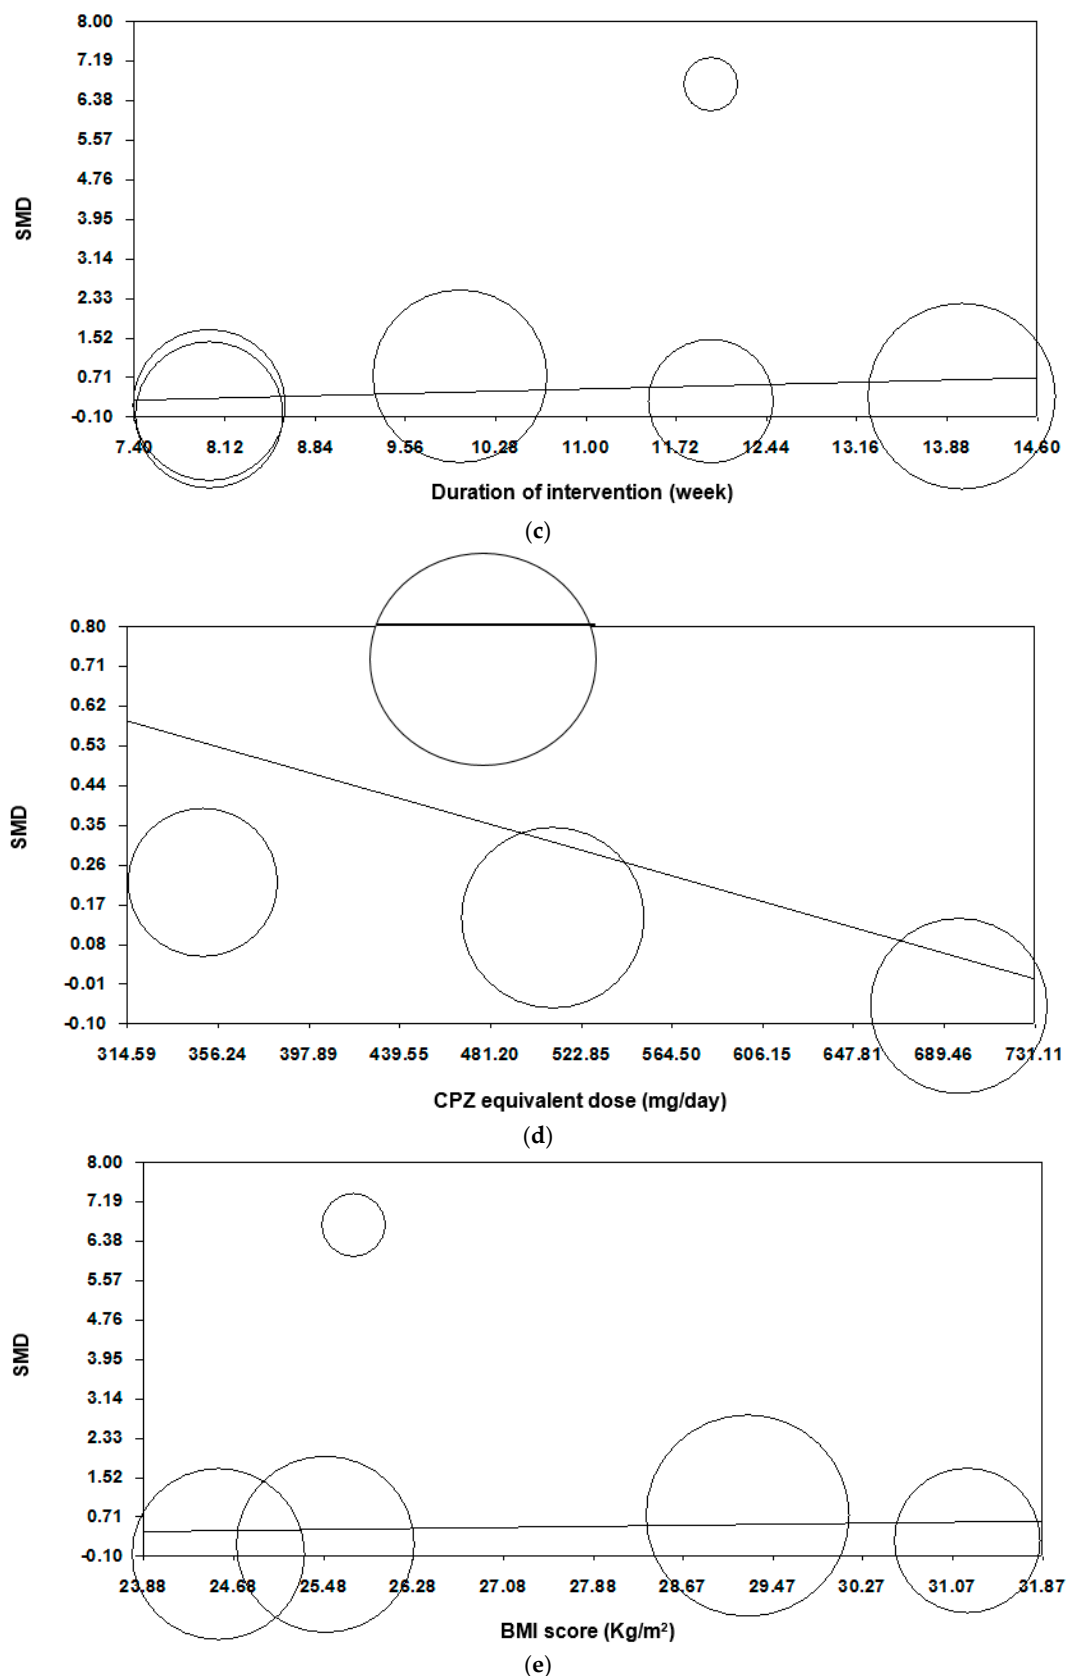

**Figure S5.** Meta-regression of moderator effects on BDNF levels by study characteristics. (a) Regression of Age on SMD; (b) Regression of Proportion of male on SMD; (c) Regression of Duration of intervention on SMD; (d) Regression of CPZ equivalent dose on SMD; (e) Regression of BMI on SMD. Abbreviations: BDNF, brain-derived neurotrophic factor; BMI, body mass index; CPZ, chlorpromazine; SMD, standardized mean difference.

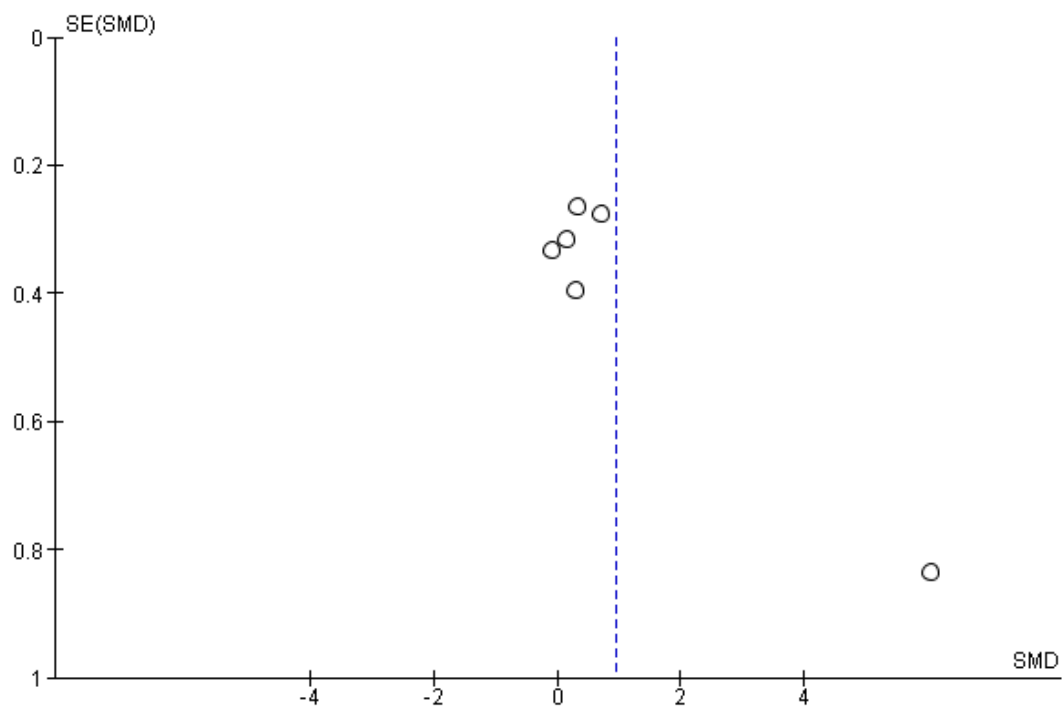

**Figure S6.** Funnel plot of Standard Error. Abbreviations: SE, standard error; SMD, standardized mean difference.

**Table S1.** Features of BDNF assessment of included studies.

| Study, Country                              | Population                                                              | Source            | Unit  | Kit                                                                     | BDNF                           |                  |                     |                   |
|---------------------------------------------|-------------------------------------------------------------------------|-------------------|-------|-------------------------------------------------------------------------|--------------------------------|------------------|---------------------|-------------------|
|                                             |                                                                         |                   |       |                                                                         | Collection Time                | Pre Intervention | Assessments         |                   |
|                                             |                                                                         |                   |       |                                                                         |                                |                  | During Intervention | Post Intervention |
| Kimhy et al., 2015 [32], United States      | Schizophrenia or related disorders<br>Outpatients                       | Serum             | ng/mL | ELISA kit, R & D Systems, Minneapolis, MN, USA                          | ~9 am<br>Overnight fast        | Baseline         |                     | Week 12           |
| Tomasik et al., 2015 [33], United States    | Schizophrenia or schizoaffective disorder<br>Outpatients                | Serum             | ng/mL | Human InflammationMAP, Myriad RBM, Austin, TX, USA                      | ND                             | Baseline         |                     | Week 14           |
| Ikai et al., 2014 [34], Japan               | Schizophrenia or related psychotic disorders<br>Outpatients             | Plasma (Salivary) | pg/dL | ELISA kit, CYT306, Millipore Corp., Bedford, MA, USA                    | 9 am~12 pm                     | Baseline         |                     | Week 8            |
| Kim et al., 2014 [35] Korea                 | Schizophrenia Inpatients<br>(more than 3 years)                         | Serum             | ng/dL | ELISA kit, CUSABIO BIOTEC CO., LTD., Wuhan, China                       | ND                             | Baseline         |                     | Week 12           |
| Miodownik et al., 2011 [36], Israel         | Schizophrenia or schizoaffective disorder<br>Inpatients and outpatients | Serum             | pg/dL | ELISA kit, CYT306, Millipore product, R&D Systems, Minneapolis, MN, USA | ND                             | Baseline         |                     | Week 8            |
| Vinogradov et al., 2009 [31], United States | Schizophrenia<br>Outpatients                                            | Serum             | ng/mL | Quantikine ELISA kit, R&D Systems, Minneapolis, MN, USA                 | Early afternoon<br>~1 pm ± 1 h | Baseline         | Week 2              | Week 10           |

Abbreviations: BDNF, brain-derived neurotrophic factor; ND, not declared.
